# Supplementary material
Source: PubMed Central journal article supplement (PMC1693829)
Supplement: pnas_0607652103_1.pdf [file pnas_0607652103_1.pdf]

Genes with multiple splice variations

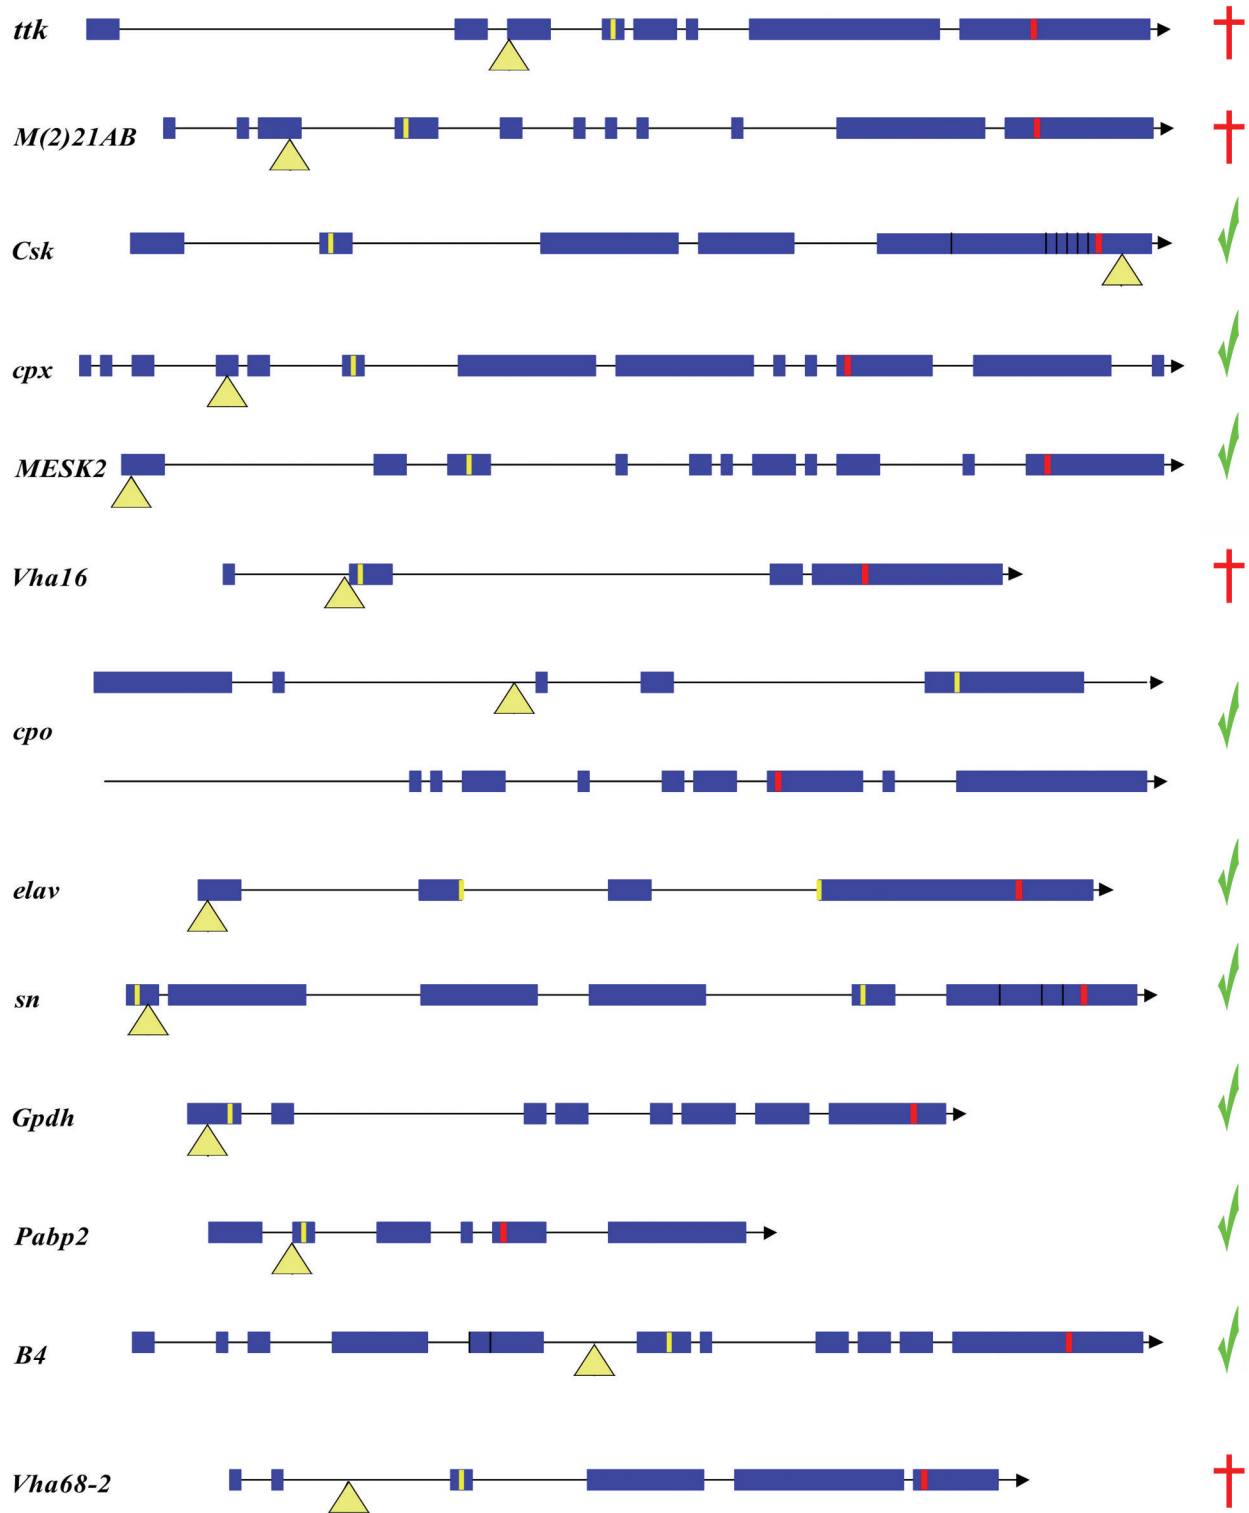

Genes with no splice variation

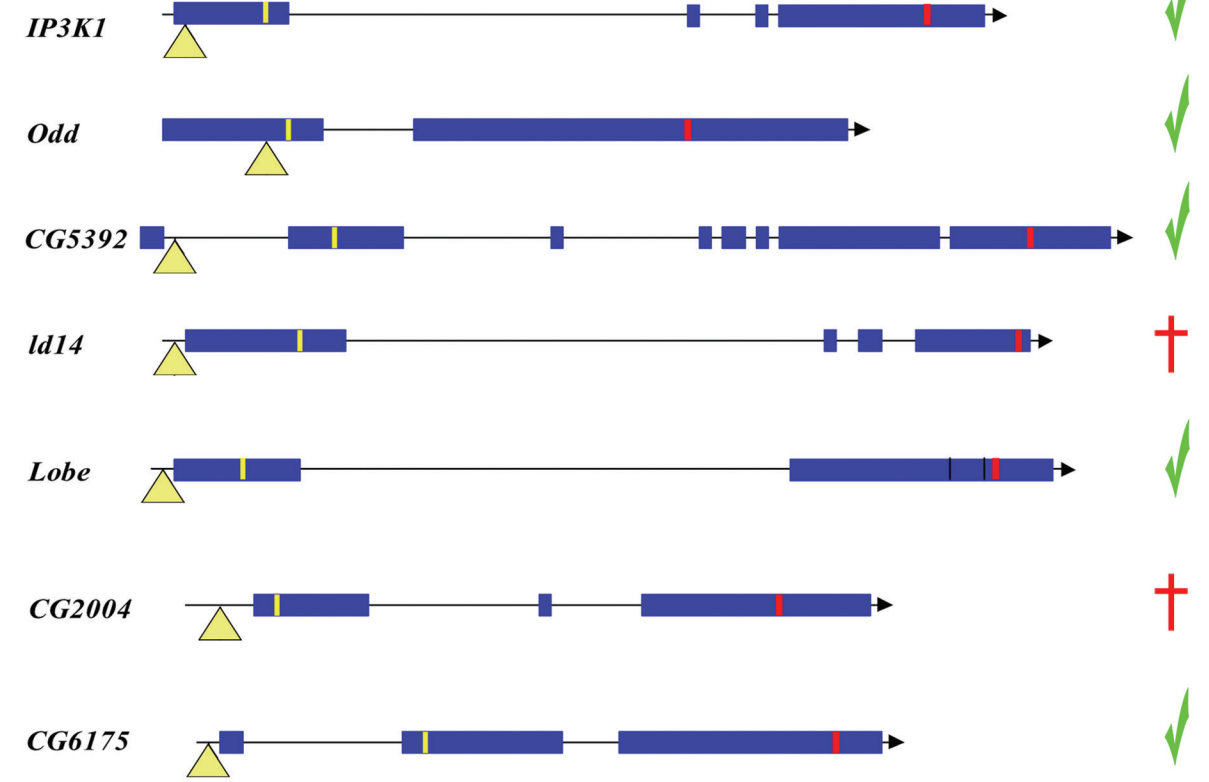

— Non coding region, ■ Exon, ■ ATG, ■ Stop, ▲ Insertion point of p-element  
 ✓ Homozygotes viable, ✗ Homozygotes lethal.
