# Supplementary material
Source: PubMed Central journal article supplement (PMC1693829)
Supplement: pnas_0607652103_2.pdf [file pnas_0607652103_2.pdf]

**Table 2. Brief description of the characterized insertions**

| Gene-trap Line   | Chromosome Location | Homozygote Viability | Expression Pattern                                                  |
|------------------|---------------------|----------------------|---------------------------------------------------------------------|
| 1                | 3rd                 | Yes                  | A.s.o.                                                              |
| <i>B4</i>        | 2nd                 | Yes                  | A.s.o., CNS, PNS                                                    |
| <i>Pabp2</i>     | 2nd                 | Yes                  | Ectoderm in late larval stages                                      |
| 4                | X                   | Yes                  | Isolated cells in CNS and PNS                                       |
| 5                | 2nd                 | Yes                  | All brain                                                           |
| 6                | X                   | Yes                  | A.s.o.                                                              |
| 7                | 3rd                 | Yes                  | All CNS                                                             |
| 8                | 3rd                 | No                   | Ring gland, trachea, and muscle                                     |
| 9                | 2nd                 | No                   | Oenocytes and fat body                                              |
| 10               | 3rd                 | Yes                  | Ring gland, cephalopharyngeal skeleton, and a few nuclei in brain   |
| <i>ldl4</i>      | X                   | No                   | Cephalopharyngeal skeleton                                          |
| 12               | 2nd                 | No                   | Cephalopharyngeal skeleton, a.s.o.                                  |
| 13               | 3rd                 | No                   | CNS, oenocytes, PNS, and gut                                        |
| 14               | 3rd                 | Yes                  | Cephalopharyngeal skeleton                                          |
| 15               | 2nd                 | Yes                  | A.s.o., pos. part of brain, isolated cells in wing disc and trachea |
| 16               | 2nd                 | Yes                  | General                                                             |
| 17               | 3rd                 | No                   | All PNS, CNS, and adult eye                                         |
| 18               | X                   | Yes                  | Parts of brain and trachea                                          |
| <i>Singed</i>    | X                   | Yes                  | General in embryo and larva                                         |
| 20               | X                   | Yes                  | Midgut and cephalopharyngeal skeleton                               |
| <i>cpx</i>       | 3rd                 | Yes                  | Graded in adult eye                                                 |
| <i>vha16</i>     | 2nd                 | No                   | Isolated cells in PNS, CNS a.s.o., and antenna                      |
| 23               | 3rd                 | Yes                  | Isolated cells in trachea                                           |
| 24               | 3rd                 | Yes                  | General in embryo and larvae                                        |
| 25               | 2nd                 | No                   | All epithelial cells                                                |
| <i>cpo</i>       | 3rd                 | Yes                  | All CNS, PNS ring gland, and a.s.o.                                 |
| 27               | 3rd                 | Yes                  | General                                                             |
| 28               | 3rd                 | Yes                  | Embryo: general. Larva: CNS and a.s.o.                              |
| <i>tramtrack</i> | 3rd                 | No                   | Cuticle and isolated cells in CNS and gut                           |
| 30               | X                   | Yes                  | Hindgut and trachea                                                 |
| 31               | X                   | Yes                  | Isolated cells in CNS and gut                                       |

| Gene-trap Line | Chromosome Location | Homozygote Viability | Expression Pattern                                                        |
|----------------|---------------------|----------------------|---------------------------------------------------------------------------|
| 32             | 3rd                 | Yes                  | Fat body                                                                  |
| 33             | X                   | Yes                  | Cephalopharyngeal skeleton                                                |
| 34             | 2nd                 | Yes                  | Embryo: general. Larva: CNS, a.s.o.                                       |
| 35             | 3rd                 | No                   | Ring gland and a few nuclei near mouth hooks                              |
| 36             | 3rd                 | Yes                  | All mesoderm                                                              |
| 37             | 2nd                 | Yes                  | Oenocytes, antenna, isolated cells in brain, and a.s.o.                   |
| 38             | 3rd                 | Yes                  | A.s.o. and antenna                                                        |
| 39             | 3rd                 | Yes                  | All trachea and CNS                                                       |
| <i>Lobe</i>    | 2nd                 | No                   | Antenna, trachea, and a.s.o.                                              |
| 41             | 2nd                 | Yes                  | Embryo: anterior stripes, Larva: stripes in head region ectoderm          |
| 42             | X                   | Yes                  | Isolated in CNS, a.s.o., and weak stripes in ectoderm                     |
| 43             | 3rd                 | Yes                  | Embryo: all lateral ectoderm. Larva: fatbody                              |
| 44             | X                   | Yes                  | Ant. Ectoderm, wing disc, isolated cells in trachea                       |
| 45             | 3rd                 | Yes                  | Antenna                                                                   |
| 46             | 2nd                 | Yes                  | Antenna, ectoderm, and a.s.o.                                             |
| 47             | 3rd                 | Yes                  | Cephalopharyngeal skeleton                                                |
| 48             | 3rd                 | Yes                  | Embryo: general. Larva: small part of foregut and anterior located cells. |
| 49             | 3rd                 | No                   | Isolated cells in trachea and CNS                                         |
| <i>Csk</i>     | 3rd                 | Yes                  | General                                                                   |
| 51             | 3rd                 | Yes                  | Mushroom body and isolated cells in CNS. Posterior spiracles              |
| <i>Gpdh</i>    | 2nd                 | Yes                  | Gut, fat body, isolated cells in CNS                                      |
| 53             | 3rd                 | Yes                  | Cephalopharyngeal skeleton                                                |
| 54             | 3rd                 | Yes                  | Faint in antenna                                                          |
| 55             | 3rd                 | Yes                  | Cephalopharyngeal skeleton                                                |
| 56             | 3rd                 | No                   | All CNS                                                                   |
| <i>Vha68</i>   | 2nd                 | No                   | All gut                                                                   |
| 58             | 3rd                 | Yes                  | Faint in cephalopharyngeal skeleton                                       |
| 59             | 3rd                 | Yes                  | A.s.o.                                                                    |
| <i>CG5392</i>  | 3rd                 | Yes                  | Few nuclei in CNS                                                         |
| 61             | 3rd                 | Yes                  | A.s.o.                                                                    |
| 62             | 3rd                 | Yes                  | Ectoderm and antenna                                                      |
| <i>CG6157</i>  | 3rd                 | Yes                  | Oenocytes, isolated cells in CNS                                          |
| 64             | 3rd                 | Yes                  | Isolated cells in head region                                             |
| 65             | 3rd                 | No                   | Embryo: ectodermal stripes                                                |

| <b>Gene-trap Line</b> | <b>Chromosome Location</b> | <b>Homozygote Viability</b> | <b>Expression Pattern</b>                                                               |
|-----------------------|----------------------------|-----------------------------|-----------------------------------------------------------------------------------------|
| <b>66</b>             | <b>3rd</b>                 | <b>No</b>                   | Embryo: dorsal ectodermal cells and oenocytes. Larva: oenocytes, gut, and subset of CNS |
| <b>67</b>             | <b>3rd</b>                 | <b>Yes</b>                  | Embryo: ectodermal stripes, isolated cells in brain and gut                             |
| <b>68</b>             | <b>3rd</b>                 | <b>Yes</b>                  | All PNS and isolated cells in brain                                                     |
| <b>69</b>             | <b>X</b>                   | <b>Yes</b>                  | A.s.o., isolated cells CNS and PNS                                                      |
| <b>70</b>             | <b>3rd</b>                 | <b>No</b>                   | Embryo: isolated cells throughout                                                       |
| <b>71</b>             | <b>X</b>                   | <b>Yes</b>                  | Early larva: oenocytes and a.s.o.                                                       |
| <b>72</b>             | <b>3rd</b>                 | <b>Yes</b>                  | A.s.o., PNS, and a few nuclei next to cephalopharyngeal skeleton                        |
| <b>73</b>             | <b>2nd</b>                 | <b>No</b>                   | All CNS and isolated cells in head region                                               |
| <b>74</b>             | <b>2nd</b>                 | <b>Yes</b>                  | All CNS, PNS, and a.s.o. adult eye                                                      |
| <b>75</b>             | <b>3rd</b>                 | <b>Yes</b>                  | Few nuclei either side of Cephalopharyngeal skeleton                                    |
| <b>76</b>             | <b>X</b>                   | <b>Yes</b>                  | General                                                                                 |
| <b>MESK2</b>          | <b>2nd</b>                 | <b>Yes</b>                  | Gut, pos. segment epidermis, isolated in brain                                          |
| <b>M(2)21AB</b>       | <b>2nd</b>                 | <b>No</b>                   | Weak in fat body, strong in ring gland                                                  |
| <b>79</b>             | <b>3rd</b>                 | <b>Yes</b>                  | A.s.o. cephalopharyngeal skeleton                                                       |
| <b>80</b>             | <b>3rd</b>                 | <b>No</b>                   | Wing disc and isolated cells CNS                                                        |
| <b>81</b>             | <b>3rd</b>                 | <b>Yes</b>                  | All mushroom body and adjacent                                                          |
| <b>82</b>             | <b>3rd</b>                 | <b>Yes</b>                  | Mushroom body                                                                           |
| <b>83</b>             | <b>2nd</b>                 | <b>No</b>                   | CNS and PNS                                                                             |
| <b>CG2004</b>         | <b>X</b>                   | <b>Yes</b>                  | Large part of brain                                                                     |
| <b>85</b>             | <b>3rd</b>                 | <b>No</b>                   | Gut and wing disc                                                                       |
| <b>86</b>             | <b>3rd</b>                 | <b>Yes</b>                  | Trachea, a.s.o., and mesoderm                                                           |
| <b>87</b>             | <b>2nd</b>                 | <b>No</b>                   | Mushroom body                                                                           |
| <b>88</b>             | <b>X</b>                   | <b>No</b>                   | CNS                                                                                     |
| <b>89</b>             | <b>3rd</b>                 | <b>Yes</b>                  | Large part of brain                                                                     |
| <b>90</b>             | <b>X</b>                   | <b>No</b>                   | Cuticle                                                                                 |
| <b>91</b>             | <b>3rd</b>                 | <b>Yes</b>                  | Faint in trachea                                                                        |
| <b>IP3KI</b>          | <b>2nd</b>                 | <b>Yes</b>                  | Riggland and isolated cells laterally in each body segment                              |
| <b>93</b>             | <b>2nd</b>                 | <b>Yes</b>                  | A.s.o., CNS, and foregut                                                                |
| <b>94</b>             | <b>2nd</b>                 | <b>No</b>                   | All gut, trachea and a.s.o.                                                             |
| <b>elav</b>           | <b>X</b>                   | <b>Yes</b>                  | All CNS                                                                                 |

| <b>Gene-trap Line</b> | <b>Chromosome Location</b> | <b>Homozygote Viability</b> | <b>Expression Pattern</b>                      |
|-----------------------|----------------------------|-----------------------------|------------------------------------------------|
| <b>96</b>             | <b>X</b>                   | <b>Yes</b>                  | Cuticle and epidermis                          |
| <b>97</b>             | <b>2nd</b>                 | <b>No</b>                   | Antenna and epidermis in last segment          |
| <b>98</b>             | <b>2nd</b>                 | <b>Yes</b>                  | Embryo: general. Larva: Fatbody                |
| <b>99</b>             | <b>3rd</b>                 | <b>No</b>                   | Cells surrounding mouth hooks                  |
| <b>100</b>            | <b>3rd</b>                 | <b>No</b>                   | CNS                                            |
| <b>101</b>            | <b>X</b>                   | <b>Yes</b>                  | A.s.o.                                         |
| <b>102</b>            | <b>3rd</b>                 | <b>No</b>                   | CNS, pos. spiracles, and antenna               |
| <b>103</b>            | <b>2nd</b>                 | <b>Yes</b>                  | A.s.o. and most of CNS                         |
| <b>104</b>            | <b>3rd</b>                 | <b>Yes</b>                  | All brain, a.s.o., and PNS                     |
| <b>105</b>            | <b>3rd</b>                 | <b>Yes</b>                  | Isolated cells in CNS and PNS                  |
| <i>odd-skipped</i>    | <b>2nd</b>                 | <b>Yes</b>                  | Embryo: stripes. Larvae: isolated cells in CNS |
| <b>107</b>            | <b>X</b>                   | <b>Yes</b>                  | Muscle                                         |
| <b>108</b>            | <b>2nd</b>                 | <b>Yes</b>                  | General                                        |
| <b>109</b>            | <b>3rd</b>                 | <b>No</b>                   | CNS, epidermis, and posterior spiracles        |
| <b>110</b>            | <b>3rd</b>                 | <b>Yes</b>                  | Brain and cephalopharyngeal skeleton           |
