# Supplementary material
Source: PubMed Central journal article supplement (PMC1693829)
Supplement: pnas_0607652103_3.pdf [file pnas_0607652103_3.pdf]

**Table 3.** Some exact insertion coordinates as determined by inverse PCR

|                 |             |
|-----------------|-------------|
| <i>ttk</i>      | 3R;27551271 |
| <i>m(2)21ab</i> | 2L;108333   |
| <i>csk</i>      | 3R;7459243  |
| <i>cpx</i>      | 3R;107560   |
| <i>MESK2</i>    | 2R;17009549 |
| <i>vha16</i>    | 2R;2144311  |
| <i>cpo</i>      | 3R;13769695 |
| <i>elav</i>     | X;379963    |
| <i>sn</i>       | X;7814919   |
| <i>gpdh</i>     | 2L;5936247  |
| <i>pabp2</i>    | 2R;3643735  |
| <i>b4</i>       | 2L;13521543 |
| <i>vha68-2</i>  | 2L;12974902 |
| <i>IP3K1</i>    | 2L;9774646  |
| <i>odd</i>      | 2L;3598987  |
| <i>CG5392</i>   | 3L;14979079 |
| <i>ld14</i>     | X;8980219   |
| <i>lobe</i>     | 2R;9544842  |
| <i>CG2004</i>   | X;860096    |
| <i>CG6175</i>   | 3L;11269805 |
